# Supplementary material
Source: PubMed Central journal article supplement (PMC9994581)
Supplement: NIHMS1874691-supplement-supplement.pdf [file NIHMS1874691-supplement-supplement.pdf]

**Supplementary Table 1. Associations Between Changes in Distress About Police Brutality and Nicotine and Marijuana Use by Route of Administration**

|                                           | OR (95% CI)        |
|-------------------------------------------|--------------------|
| <b>Nicotine</b>                           |                    |
| Combustible products                      |                    |
| Change in distress about police brutality | 1.05 (0.94, 1.19)  |
| E-Cigarettes                              |                    |
| Change in distress about police brutality | 1.06 (0.97, 1.16)  |
| Smokeless tobacco products                |                    |
| Change in distress about police brutality | 0.66 (0.41, 1.06)  |
| <b>Cannabis</b>                           |                    |
| Smoked cannabis                           |                    |
| Change in distress about police brutality | 1.08 (1.00, 1.17)* |
| Vaped cannabis                            |                    |
| Change in distress about police brutality | 1.09 (1.00, 1.19)* |
| All other cannabis                        |                    |
| Change in distress about police brutality | 1.07 (0.99, 1.16)  |

Models adjusted for age, sex, race/ethnicity, highest educational attainment, personal financial status, and previous use of categorical substances in Wave 8

\*P < 0.05

**Supplementary Table 2. Participant Characteristics of the Analytic Sample Versus Samples Missing Data or Loss-To-Follow-Up**

|                                                                       | Samples                                         |                         |                |                                                   |                |                                 |                |
|-----------------------------------------------------------------------|-------------------------------------------------|-------------------------|----------------|---------------------------------------------------|----------------|---------------------------------|----------------|
|                                                                       | Completed W8 and W10 (analytic sample) (n=1797) | Missing W8 data (n=640) | P <sup>b</sup> | Completed W8 but dropped out prior to W10 (n=759) | P <sup>c</sup> | Dropped out prior to W8 (n=200) | P <sup>d</sup> |
| Age (range = 20.2 - 23.0), mean ± SD                                  | 21.16 ± 0.39                                    | 21.22 ± 0.44            | <0.05          | -- <sup>e</sup>                                   | --             | -- <sup>e</sup>                 | --             |
| Sex, n (%)                                                            |                                                 |                         | <0.05          |                                                   | <0.05          |                                 | <0.05          |
| Female                                                                | 1081 (60.2%)                                    | 353 (55.2%)             |                | 298 (39.3%)                                       |                | 75 (37.5%)                      |                |
| Male                                                                  | 716 (39.8%)                                     | 287 (44.8%)             |                | 451 (59.4%)                                       |                | 123 (61.5%)                     |                |
| No response                                                           | 0 (0.0%)                                        | 0 (0.0%)                |                | 10 (1.3%)                                         |                | 2 (1.0%)                        |                |
| Race/ethnicity, n (%)                                                 |                                                 |                         | <0.05          |                                                   | <0.05          |                                 | <0.05          |
| Black/African American                                                | 61 (3.4%)                                       | 24 (3.8%)               |                | 42 (5.5%)                                         |                | 10 (5.0%)                       |                |
| Hispanic/Latino                                                       | 980 (54.5%)                                     | 368 (57.5%)             |                | 374 (49.3%)                                       |                | 102 (51.0%)                     |                |
| Multiracial                                                           | 157 (8.7%)                                      | 76 (11.9%)              |                | 41 (5.4%)                                         |                | 14 (7.0%)                       |                |
| Asian American/Pacific Islander                                       | 375 (20.9%)                                     | 76 (11.9%)              |                | 96 (12.6%)                                        |                | 11 (5.5%)                       |                |
| Another race/ethnicity <sup>a</sup>                                   | 21 (1.2%)                                       | 16 (2.5%)               |                | 73 (9.6%)                                         |                | 20 (10.0%)                      |                |
| White                                                                 | 203 (11.3%)                                     | 80 (12.5%)              |                | 133 (17.5%)                                       |                | 43 (21.5%)                      |                |
| Highest Educational Attainment                                        |                                                 |                         | <0.05          |                                                   | --             |                                 | --             |
| Post-Secondary                                                        | 1351 (75.2%)                                    | 408 (63.8%)             |                | -- <sup>e</sup>                                   |                | -- <sup>e</sup>                 |                |
| HS Grad and lower                                                     | 446 (24.8%)                                     | 215 (33.6%)             |                | -- <sup>e</sup>                                   |                | -- <sup>e</sup>                 |                |
| No response                                                           | 0 (0.0%)                                        | 17 (2.7%)               |                | -- <sup>e</sup>                                   |                | -- <sup>e</sup>                 |                |
| Personal Financial Status                                             |                                                 |                         | <0.05          |                                                   | --             | -- <sup>e</sup>                 | --             |
| Live comfortably                                                      | 823 (45.8%)                                     | 267 (41.7%)             |                | -- <sup>e</sup>                                   |                | -- <sup>e</sup>                 |                |
| Meet needs with a little left                                         | 546 (30.3%)                                     | 179 (28.0%)             |                | -- <sup>e</sup>                                   |                | -- <sup>e</sup>                 |                |
| Just meet basic expenses                                              | 376 (20.9%)                                     | 140 (21.9%)             |                | -- <sup>e</sup>                                   |                | -- <sup>e</sup>                 |                |
| Don't meet basic expenses                                             | 49 (2.7%)                                       | 35 (5.5%)               |                | -- <sup>e</sup>                                   |                | -- <sup>e</sup>                 |                |
| No response                                                           | 0 (0.0%)                                        | 19 (3.0%)               |                | -- <sup>e</sup>                                   |                | -- <sup>e</sup>                 |                |
| Change in distress about police brutality (range = -4 - 4), mean ± SD | 0.84 ± 1.48                                     | --                      | --             | -- <sup>e</sup>                                   | --             | -- <sup>e</sup>                 | --             |
| No response                                                           | --                                              | 640 (100%)              |                | -- <sup>e</sup>                                   |                | -- <sup>e</sup>                 |                |

|                                      |              |             |       |                 |    |                 |                 |    |
|--------------------------------------|--------------|-------------|-------|-----------------|----|-----------------|-----------------|----|
| Past-30-Day Substance Use            |              |             |       |                 |    |                 | -- <sup>e</sup> |    |
| Nicotine (Yes)                       | 364 (20.3%)  | 175 (27.3%) | <0.05 | -- <sup>e</sup> | -- | -- <sup>e</sup> | --              | -- |
| Cannabis (Yes)                       | 620 (34.5%)  | 242 (37.8%) | 0.15  | -- <sup>e</sup> | -- | -- <sup>e</sup> | --              | -- |
| Alcohol (Yes)                        | 1035 (57.6%) | 357 (55.8%) | 0.45  | -- <sup>e</sup> | -- | -- <sup>e</sup> | --              | -- |
| Other Drugs (Yes)                    | 40 (2.2%)    | 18 (2.8%)   | 0.49  | -- <sup>e</sup> | -- | -- <sup>e</sup> | --              | -- |
| Number of substances used, mean ± SD | 1.96 ± 2.41  | 2.25 ± 2.61 | <0.05 | -- <sup>e</sup> | -- | -- <sup>e</sup> | --              | -- |

<sup>a</sup> Another race/ethnicity category includes middle eastern and indigenous ethnicities

<sup>b</sup> Pairwise comparison between analytic sample and respondents who were missing wave 8 (W8) data

<sup>c</sup> Pairwise comparison between the analytic sample and respondents who completed W8 but dropped out prior to wave 10 (W10)

<sup>d</sup> Pairwise comparison between the analytic sample and respondents who dropped out prior to W8

<sup>e</sup> Data were not available

**Supplementary Table 3. Associations Between Changes in Distress About Police Brutality and Past 30-Day Substance Use Volume (Frequency × Intensity), Outcomes Overall and by Race/Ethnicity**

|                              | Stratified by Race/Ethnicity |                        |                 |             |                   |       |                                     |
|------------------------------|------------------------------|------------------------|-----------------|-------------|-------------------|-------|-------------------------------------|
|                              | Overall sample               | Black/African American | Hispanic/Latino | Multiracial | AAPI <sup>a</sup> | White | Another race/ethnicity <sup>b</sup> |
| Cigarettes <sup>c, d</sup>   |                              |                        |                 |             |                   |       |                                     |
| Unadjusted (B)               | -0.02                        | -0.03                  | -0.01           | 0.13        | 0.09              | -0.11 | 0.05                                |
| Adjusted (β)                 | -0.03                        | 0.02                   | -0.01           | 0.06        | 0.09              | -0.08 | -0.28                               |
| E-cigarettes <sup>c, e</sup> |                              |                        |                 |             |                   |       |                                     |
| Unadjusted (B)               | 0.02                         | -0.11                  | 0.05            | -0.03       | 0.00              | 0.03  | -0.16                               |
| Adjusted (β)                 | 0.01                         | -0.16                  | 0.03            | 0.04        | -0.03             | 0.06  | -0.18                               |
| Cannabis <sup>c, f</sup>     |                              |                        |                 |             |                   |       |                                     |
| Unadjusted (B)               | -0.02                        | 0.18                   | -0.03           | -0.05       | -0.01             | 0.04  | 0.22                                |
| Adjusted (β)                 | -0.03                        | 0.23                   | -0.04           | -0.04       | -0.02             | 0.03  | 0.00                                |
| Alcohol <sup>c, g</sup>      |                              |                        |                 |             |                   |       |                                     |
| Unadjusted (B)               | 0.06*                        | 0.13                   | 0.08*           | 0.06        | 0.07              | -0.06 | -0.26                               |
| Adjusted (β)                 | 0.04                         | 0.14                   | 0.07*           | 0.08        | 0.06              | -0.09 | -0.29                               |

<sup>a</sup> Asian American/Pacific Islander

<sup>b</sup> Another race/ethnicity category includes middle eastern and indigenous ethnicities

<sup>c</sup> Models adjusted for age, sex, race/ethnicity, highest educational attainment, personal financial status, and previous use of categorical substances in Wave 8

<sup>d</sup> Past 30-day cigarette use volume: (number of days used × the number of cigarettes smoked per typical smoking day)

<sup>e</sup> Past 30-day e-cigarette use volume: (number of days used × nicotine vaping sessions per vaping day × number of puffs per vaping session)

<sup>f</sup> Past 30-day cannabis use volume: (number of days used × bowls/joints per cannabis smoking day) or (number of days used × cannabis vaping sessions per vaping day × number of puffs per vaping session)

<sup>g</sup> Past 30-day alcohol use volume: (number of days used × drinks per drinking day)

\*P < 0.05
